# Supplementary material for: Implications of the accumulation of CXCR5+ NK cells in lymph nodes of HIV-1 infected patients
Source: PubMed Central journal article supplement — eBioMedicine. 2021 Dec 29;75:103794. doi: 10.1016/j.ebiom.2021.103794 (PMC8728057; doi:10.1016/j.ebiom.2021.103794), 2021-12-29
Supplement: mmc1.pdf [file mmc1.pdf]

# Contents

- **Supplementary Figure 1** .....1
- **Supplementary Figure 2**.....2
- **Supplementary Figure 3**.....3
- **Supplementary Figure 4**.....4
- **Supplementary Figure 5**.....5
- **Supplementary Table 1** .....6
- **Supplementary Table 2** .....7

## Supplementary Figure 1 .

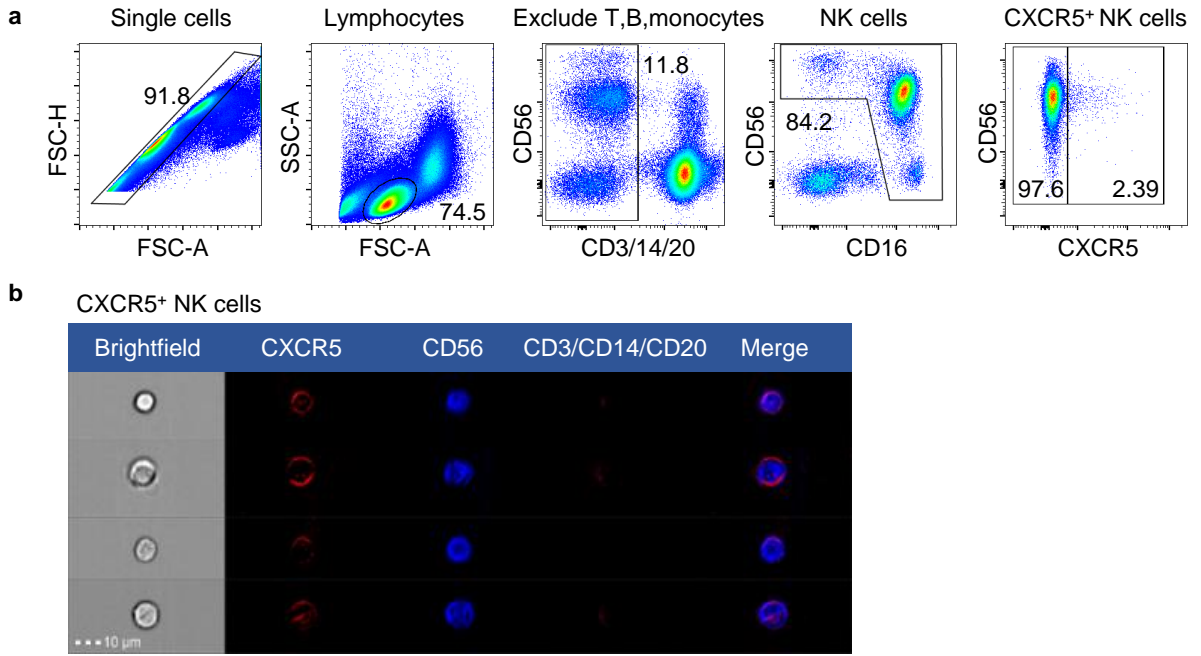

**Supplementary Figure 1. Representative flow cytometry plot of peripheral CXCR5<sup>+</sup> NK cells. (a)** Gating strategy of peripheral CXCR5<sup>+</sup> NK cells by flow cytometry. Numbers indicate the percentage of gated cells. **(b)** The expression of CXCR5 (red), CD56 (blue), and CD3/CD14/CD20 (purple) of peripheral CXCR5<sup>+</sup> NK cells were visualized by image flow cytometry.

Supplementary Figure 2 .

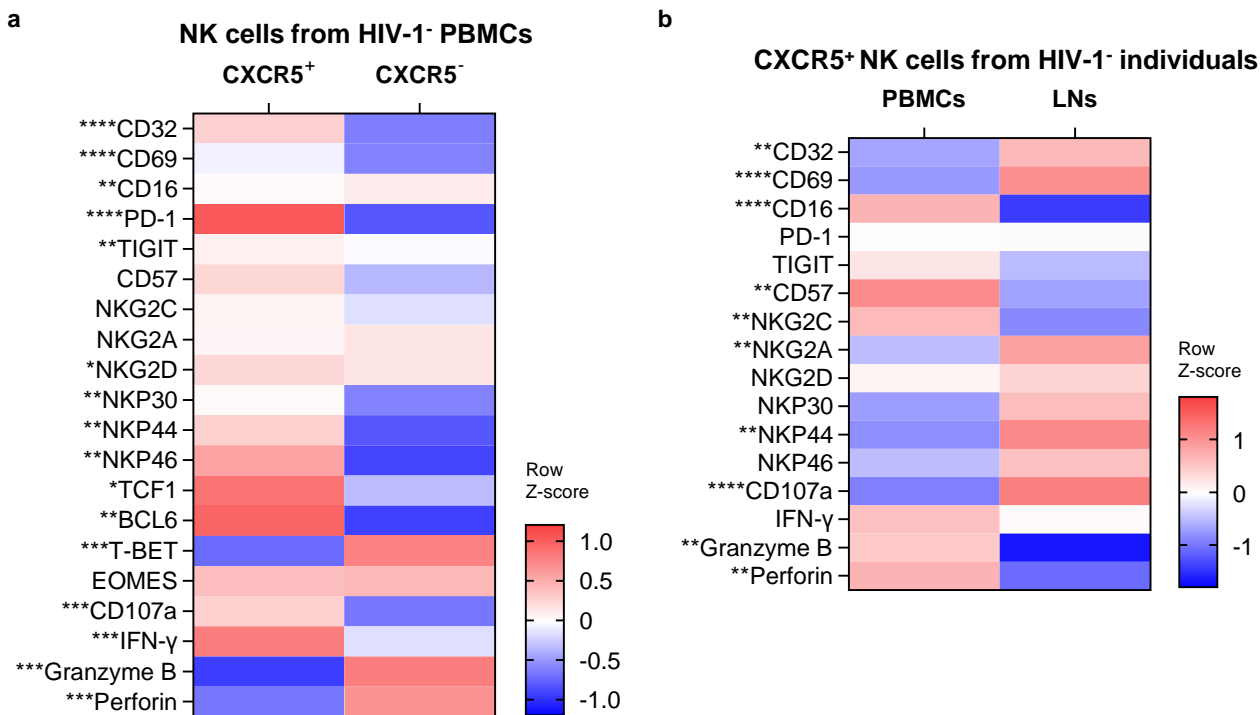

**Supplementary Figure 2. Phenotypic and functional profiles of CXCR5<sup>+</sup> and CXCR5<sup>-</sup> NK cells in PBMCs and LNs from HIV-1 negative individuals.** (a) The protein expression phenotypes of peripheral CXCR5<sup>+</sup> and CXCR5<sup>-</sup> NK cells from HIV-1<sup>-</sup> PBMCs were obtained by flow cytometry. (b) The protein expression phenotypes of CXCR5<sup>+</sup> NK cells from HIV-1<sup>-</sup> LNs and PBMCs were obtained by flow cytometry. Significant differences in a were calculated using Wilcoxon signed-rank test, and b were calculated using Mann-Whitney U test. \* $P < 0.05$ , \*\*  $P < 0.01$ , \*\*\* $P < 0.001$ , \*\*\*\* $P < 0.0001$ .

**Supplementary Figure 3 .**

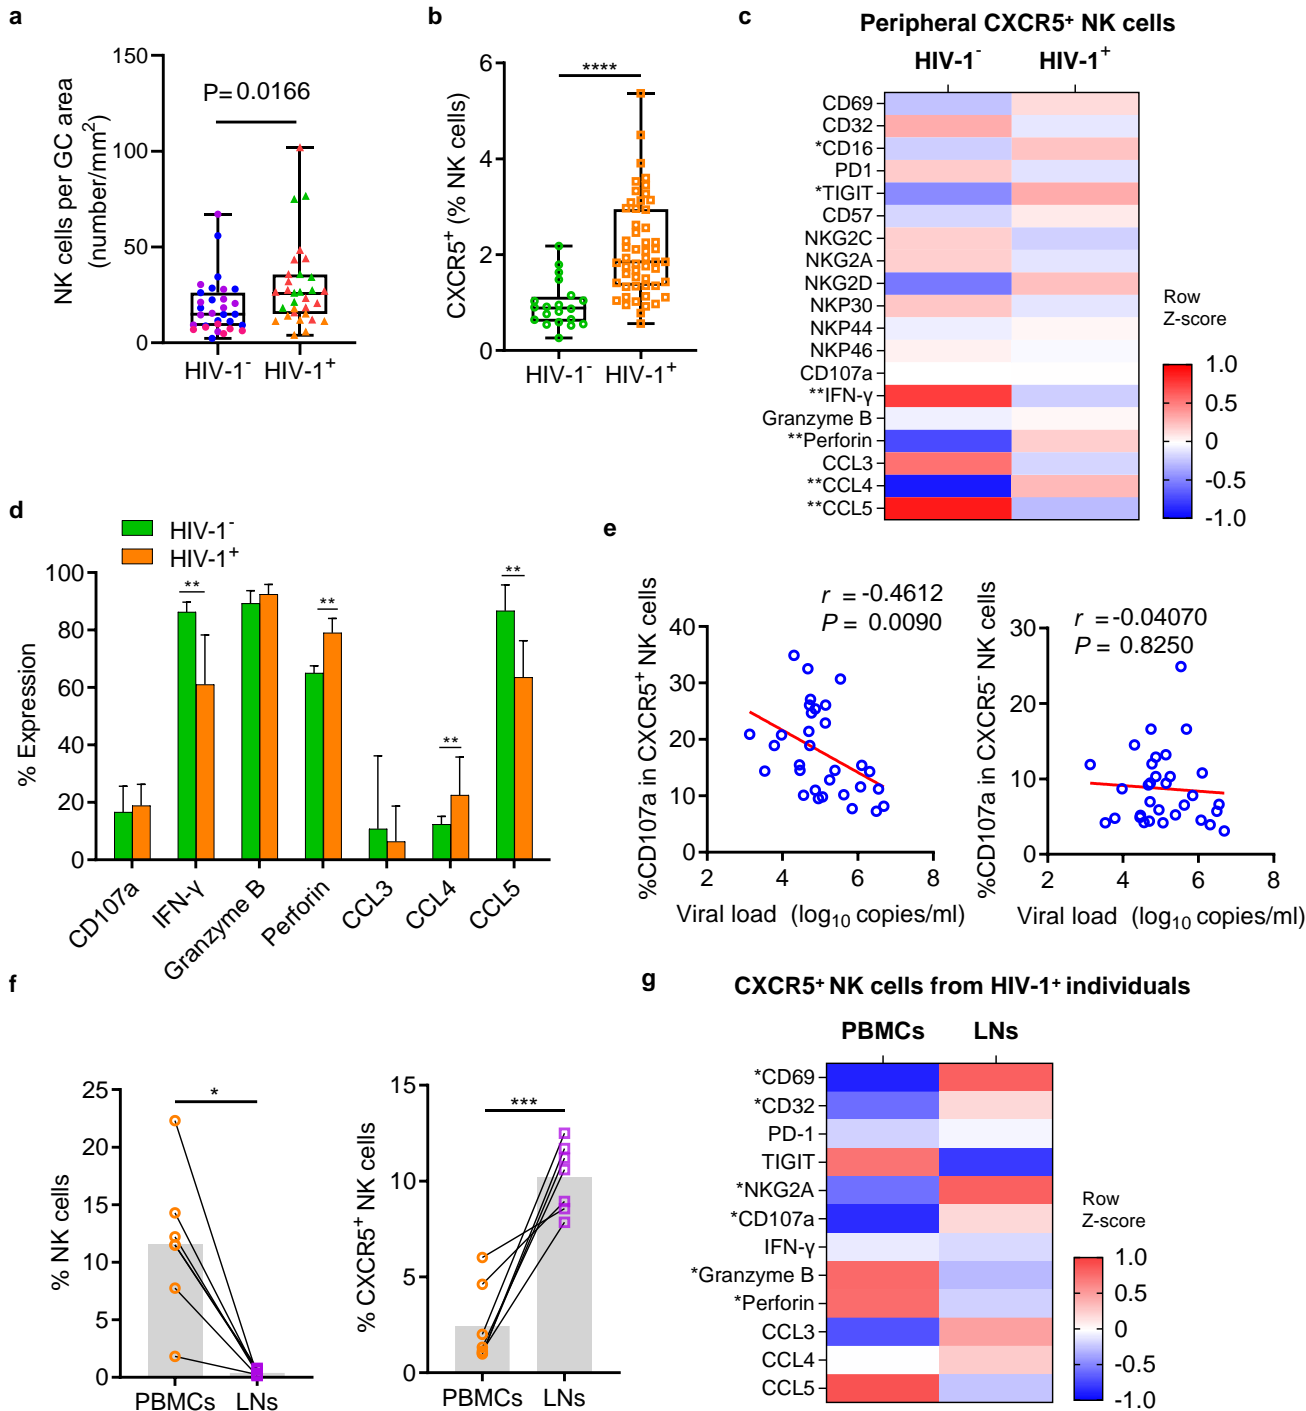

**Supplementary Figure 3. Effect of HIV-1 infection on frequency, phenotypic and functional features of peripheral CXCR5<sup>+</sup> NK cells.** (a) The number of CD56<sup>+</sup> cells per area of GC between HIV-1<sup>-</sup> and HIV-1<sup>+</sup> individuals, follicles from the same individual are displayed in the same color. (b) The frequency of peripheral CXCR5<sup>+</sup> NK cells from HIV-1<sup>-</sup> (n = 20) and HIV-1<sup>+</sup> (n = 53) individuals. (c) The protein expression phenotypes of peripheral CXCR5<sup>+</sup> NK cells from HIV-1<sup>-</sup> and HIV-1<sup>+</sup> individuals were obtained by flow cytometry. (d) The expression of functional molecules from peripheral CXCR5<sup>+</sup> NK cells in HIV-1<sup>-</sup> and HIV-1<sup>+</sup> individuals, data represented as median with interquartile range. (e) The correlation between plasma HIV-1 viral load and CD107a expression on peripheral CXCR5<sup>+</sup> NK cells (n = 31). (f) Paired comparison of NK (upper) and CXCR5<sup>+</sup> NK (lower) frequencies in PBMCs and LNs from HIV-1<sup>+</sup> individuals (n = 7). (g) The protein expression phenotypes of CXCR5<sup>+</sup> NK cells from HIV-1<sup>+</sup> LNs and paired PBMCs were obtained by flow cytometry. Significant differences in a, b, and c were calculated using Mann-Whitney U test, and e, f were calculated using Wilcoxon signed-rank test. Correlation in d were calculated using Spearman correlation coefficient. \* $P < 0.05$ , \*\* $P < 0.01$ , \*\*\* $P < 0.001$ , \*\*\*\* $P < 0.0001$ .

Supplementary Figure 4 .

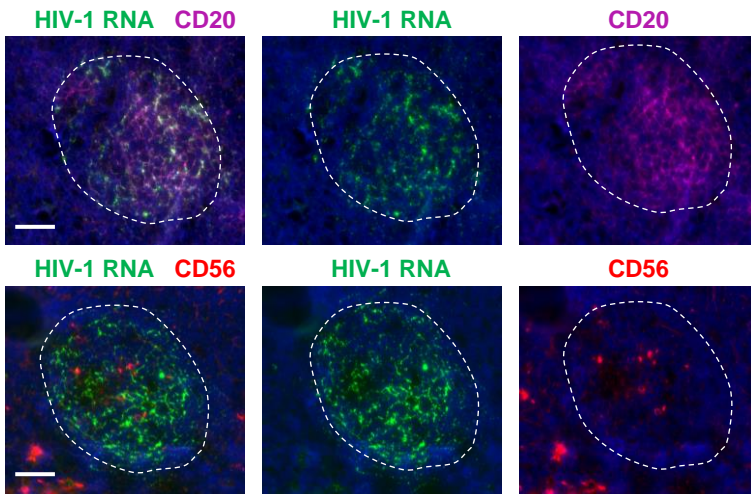

**Supplementary Figure 4. HIV-1 mainly located in B cell follicles.** Immunofluorescence staining of HIV-1 RNA (green), CD20 (pink) and CD56 (red) of serial sections from one HIV-1<sup>+</sup> LN (patient No. 6), the circled area represents a B cell follicle. Scale bar = 100  $\mu$ m.

Supplementary Figure 5 .

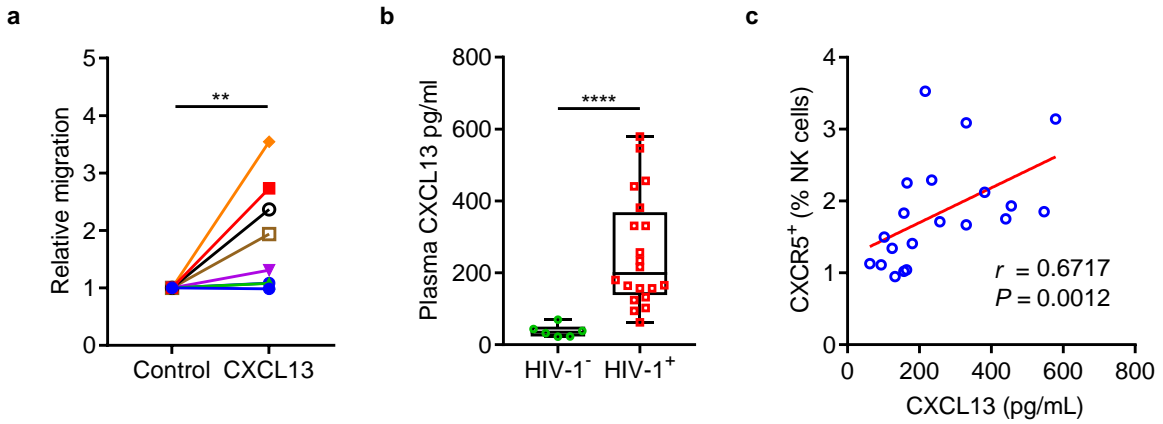

**Supplementary Figure 5. The relationship between plasma CXCL13 level and peripheral CXCR5<sup>+</sup> NK cells.** (a) The relative migration rates of CXCR5<sup>+</sup> NK cells towards CXCL13 were measured by transwell assay (n = 8). (b) CXCL13 plasma concentrations (pg/mL) were measured by ELISA and plotted for HIV-1<sup>-</sup> and HIV-1<sup>+</sup> individuals. (c) Correlation between peripheral CXCR5<sup>+</sup> NK cell frequency and plasma CXCL13 levels (n = 20). Significant differences in a were calculated using Wilcoxon signed-rank, and test b were calculated using Mann-Whitney U test. Correlation in c were calculated using Spearman correlation coefficient. \*\*  $P < 0.01$ , \*\*\*\*  $P < 0.0001$ .

**Supplementary Table 1.** Characteristics of the participants for PBMC samples

| Characteristics                                             | HIV-1 negative group (n=20) | HIV-1 infected group (n=53) |
|-------------------------------------------------------------|-----------------------------|-----------------------------|
| <b>Gender (male/female)</b>                                 | 14/6                        | 50/3                        |
| <b>Age (years)</b>                                          | 28 (26.25-34.5)             | 31 (24.5-40)                |
| <b>CD4<sup>+</sup> T (cells/<math>\mu</math>l)</b>          | 855.5 (605.8-932)           | 266 (174-394)               |
| <b>CD8<sup>+</sup> T (cells/<math>\mu</math>l)</b>          | 641.5 (521-779.8)           | 1038 (663-1289)             |
| <b>CD4/CD8 ratio</b>                                        | 1.20 (0.97-1.52)            | 0.24 (0.16-0.41)            |
| <b>Plasma viral load (<math>\log_{10}</math> copies/ml)</b> | NA                          | 4.99 (4.65-5.53)            |

All indicators except gender were shown as median (Interquartile range); NA: not available

**Supplementary Table 2.** Antibodies used in this study

| Reagent or resource            | Source           | Clone    | Catalogue number | RRID        |
|--------------------------------|------------------|----------|------------------|-------------|
| Anti-human CD3 APC/Fire750     | Biologend        | SK7      | 344840           | AB_2572114  |
| Anti-human CD14 APC/Fire750    | Biologend        | 63D3     | 367120           | AB_2572099  |
| Anti-human CD14 PE             | BD               | M5E2     | 555398           | AB_395799   |
| Anti-human CD19 FITC           | BD               | HIB19    | 555412           | AB_395812   |
| Anti-human CD20 APC/Fire750    | Biologend        | 2H7      | 302358           | AB_2572126  |
| Anti-human CD16 PerCP          | Biologend        | 3G8      | 302030           | AB_940380   |
| Anti-human CXCR5 BV421         | BD               | RF8B2    | 562747           | AB_2737766  |
| Anti-human CXCR5 APC           | Biologend        | J252D4   | 356908           | AB_2561817  |
| Anti-human CXCR5 PE-CY7        | Biologend        | J252D4   | 356923           | AB_2562354  |
| Anti-human CD56 APC            | Tongsheng Shidai | NA       | Z6410017         | NA          |
| Anti-human CD56 PerCP          | Biologend        | HCD56    | 318322           | AB_893389   |
| Anti-human CD56 BV510          | BD               | NCAM16.2 | 563041           | AB_2732786  |
| Anti-human CD32 PE             | Biologend        | FUN-2    | 303206           | AB_314338   |
| Anti-human CD32 FITC           | BD               | 3D3      | 552883           | AB_394512   |
| Anti-human CD69 PE-CY7         | Biologend        | FN50     | 310912           | AB_314847   |
| Anti-human NKG2A FITC          | Miltenyi Biotec  | REA110   | 130-113-565      | AB_2733623  |
| Anti-human NKG2D PE-CY7        | BD               | 1D11     | 562365           | AB_11153309 |
| Anti-human NKp30 AF647         | BD               | p30-15   | 558408           | AB_647154   |
| Anti-human NKp44 PE            | BD               | p44-8    | 558563           | AB_647239   |
| Anti-human NKp46 BV510         | Biologend        | 9E2      | 331924           | AB_2563854  |
| Anti-human PD-1 BV510          | Biologend        | EH12.2H7 | 329932           | AB_2562256  |
| Anti-human TIGIT PE            | Biologend        | A15153G  | 372704           | AB_2632730  |
| Anti-human CD107a FITC         | Biologend        | H4A3     | 328606           | AB_1186036  |
| Anti-human Granzyme B PE       | Biologend        | QA16A02  | 372208           | AB_2687032  |
| Anti-human Perforin PE-CY7     | Biologend        | B-D48    | 353316           | AB_2571973  |
| Anti-human IFN- $\gamma$ BV510 | BD               | B27      | 563287           | AB_2738118  |
| Anti-human CD57 BV605          | Biologend        | QA17A04  | 393304           | AB_2728426  |
| Anti-human NKG2C PE-vi770      | Miltenyi Biotec  | REA205   | 130-103-637      | AB_2655398  |
| Anti-human T-bet FITC          | Biologend        | 4B10     | 644811           | AB_2287097  |
| Anti-human Tcf-1 PE            | Biologend        | 7F11A10  | 655207           | AB_2728491  |
| Anti-human Bcl-6 PE-CY7        | Biologend        | 7D1      | 358511           | AB_2566195  |
| Anti-human Eomes eFluor660     | eBioscience      | WD1928   | 50-4877-42       | AB_2574229  |
| Anti-human KI67 PE             | BD               | B65      | 562899           | AB_2686897  |
| Anti-human CCL3 FITC           | eBioscience      | CR3M     | 11-9706-41       | AB_2572533  |
| Anti-human CCL4 APC            | eBioscience      | FL34Z3L  | 17-7540-42       | AB_2573264  |
| Anti-human CCL5 BV421          | BD               | 2D5      | 564754           | AB_2738932  |
| Anti-human KIR3DL1-PE          | Miltenyi Biotec  | DX9      | 130-092-473      | AB_871615   |
| Anti-human KIR2D-PE            | Miltenyi Biotec  | NKVFS1   | 130-123-710      | AB_2819517  |
| Anti-human CXCL13 Antibody     | ZSGB-BIO         | NA       | ZG-0601          | NA          |
| Anti-human NCAM1 Antibody      | abcam            | EP2567Y  | ab75813          | AB_2632384  |
| Anti-human CXCR5 Antibody      | R&D              | 51505    | MAB190           | AB_2292654  |
| Anti-human CD20 Antibody       | ZSGB-BIO         | OT11H4   | ZA-0549          | NA          |
| Anti-human CD3 Antibody        | ZSGB-BIO         | EP41     | ZA-0503          | NA          |

NA: not available
